# Supplementary material for: Novel Mechanism of Action on Hedgehog Signaling by a Suppressor of Fused Carboxy Terminal Variant
Source: PubMed Central journal article supplement (PMC3362617; doi:10.1371/journal.pone.0037761), 2012-05-29

## Supplemental fig 1

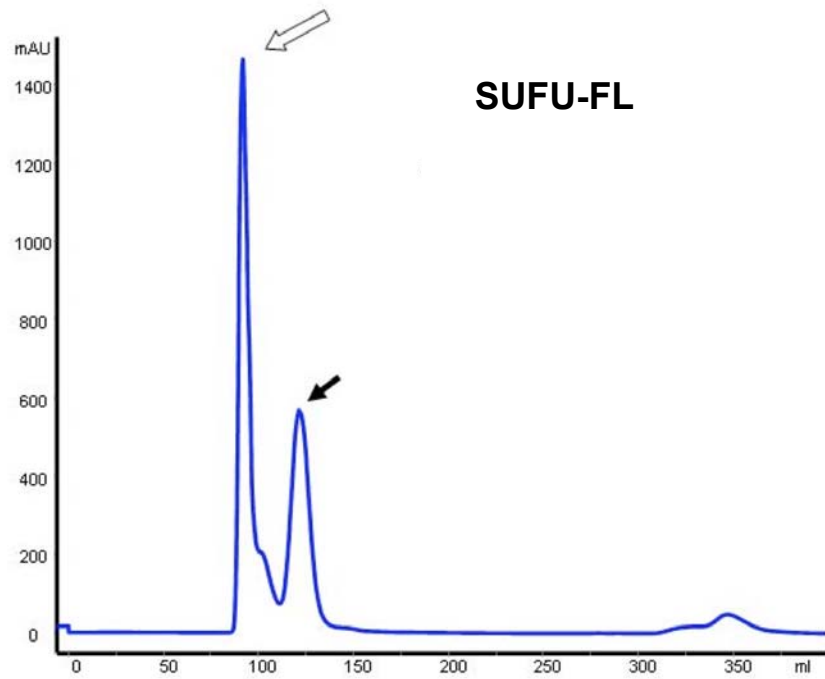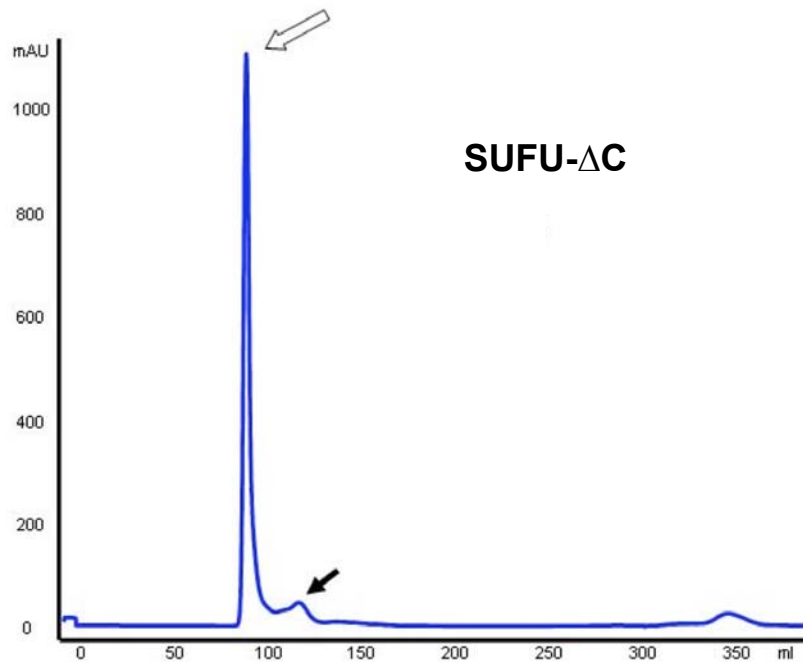

Supplement: pone.0037761.s001.pdf [file pone.0037761.s001.pdf]
