# Supplementary material for: Novel Mechanism of Action on Hedgehog Signaling by a Suppressor of Fused Carboxy Terminal Variant
Source: PubMed Central journal article supplement (PMC3362617; doi:10.1371/journal.pone.0037761), 2012-05-29

### Supplemental fig 3

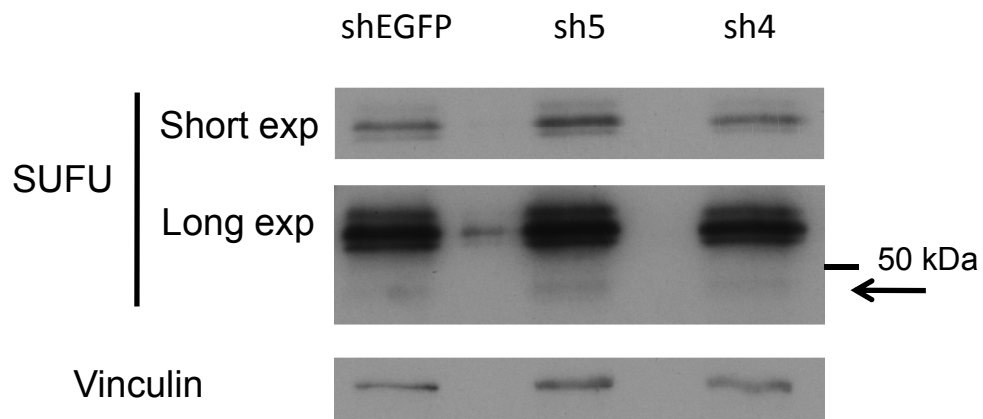

### $\Delta C$ long/FL short

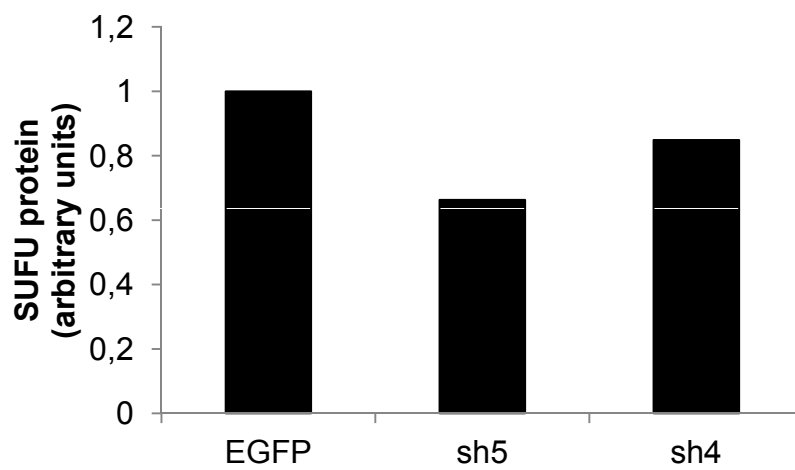

Supplement: pone.0037761.s003.pdf [file pone.0037761.s003.pdf]
