# Supplementary material for: Novel Mechanism of Action on Hedgehog Signaling by a Suppressor of Fused Carboxy Terminal Variant
Source: PubMed Central journal article supplement (PMC3362617; doi:10.1371/journal.pone.0037761), 2012-05-29
Supplement: pone.0037761.s005.pdf [file pone.0037761.s005.pdf]

## Supplemental Table

| Primer        | 5' – 3'                     |
|---------------|-----------------------------|
| RPLPO-F       | CCTTCTCCTTTGGGCTGGTCATCCA   |
| RPLPO-R       | CAGACACTGGCAACATTGCGGACAC   |
| TBP-F         | GCCAGCTTCGGAGAGTTCTGGGATT   |
| TBP-R         | CGGGCACGAAGTGCAATGGTCTTTA   |
| PTCH1-1B-F    | CCGCCTTCGCTCTGGAGCAGATT     |
| PTCH1-1C-F    | GTTGACGGCCGGCTATGGGGAAG     |
| PTCH1-1B/1C-R | TCTGAAACTTCGCTCTCAGCCACAGC  |
| HHIP-F        | TTTTACACTTGCCGAGGCCATATTCCA |
| HHIP-R        | AGCACAACCCACCATCTTTTCTTGCAT |
| GLI1-F        | CAGCTACATCAACTCCGGCCAATAGGG |
| GLI1-R        | TGCTGCGGCGTTCAAGAGAGACTG    |
